1 **Adverse effects of hunting with hounds on participants and bystanders**

2 A. Treves<sup>1†\*</sup>, L. Menefee<sup>†2†</sup>

3 <sup>1</sup> Nelson Institute for Environmental Studies, University of Wisconsin, Madison, WI, United  
4 States

5 <sup>2</sup> Department of Literature, Leeward College, University of Hawai'i, Pearl City, HI and Sierra Club  
6 Wisconsin Chapter, United States

7 <sup>†</sup> These authors have contributed equally and share first authorship.

8 \* **Correspondence:** [atreves@wisc.edu](mailto:atreves@wisc.edu)

9 **Runnign title:** Adverse effects of hounding

10 **Acknowledgments:** Thanks to R. P. Thiel and C. Williamson for scientific advice, H. L. Wright for  
11 graphics design, Elizabeth Huntley for help with survey design, and Sierra Club Wisconsin  
12 Chapter for administering the online survey and providing survey data to LM. C. Williamson and  
13 R. P. Thiel curated the WHI data on WHI with advice from collaborators unknown to the  
14 authors.

15 **Declaration of competing interests:** The authors declare no competing interests in the conduct  
16 of this research.

17 **Financial disclosures:** This research was not funded by any third party.

18 **Data Availability:** Upon acceptance, authors will make the de-identified data available on  
19 [http://faculty.nelson.wisc.edu/treves/data\\_archives/](http://faculty.nelson.wisc.edu/treves/data_archives/)

20 **Key words:** carnivore, conflict, dog, law enforcement, policy, wildlife crime, wolf

21

22 **Length:** 6550 words, 27 pages, 0 figures, 2 tables

23

24 **ABSTRACT**

25 In the face of biodiversity crises, some societies are re-examining many human uses of nature.

26 One activity that may once have been unobjectionable has undergone little scrutiny in most

27 countries: hunting mammals with free-running hounds. We present two novel datasets about

28 this under-studied hunting method. In Wisconsin, USA, hounds and gray wolves occasionally

29 interacted aggressively and human by-standers reported adverse interactions with hounds and

30 their handlers. Self-selected samples cannot be used to extrapolate in space or time but do

31 provide new information. Between 1999 and 2012, 176 hounds were reported to have suffered

32 injury during encounters with wolves. No government data were collected on how many wolves

33 or other non-target animals were injured by hounds as required by the U.S. Endangered Species

34 Act. Between 2015–2021, bystanders (n=105) reported various incidents of illegal behavior by

35 hounds and handlers, adverse interactions with law enforcement, and other adverse events.

36 We propose reforms to wildlife policy, law enforcement policy, greater oversight of hounding,

37 and criminal prosecution. We discuss the implications for theories of dog domestication.

38 **INTRODUCTION**

39 In the face of a global biodiversity crisis partly caused by climate change and partly by

40 human-induced mortality, some societies are re-examining many human uses of animals and

41 habitats that once seemed unobjectionable. For example, uses of poison, off-road vehicles, the

42 control of fire in ecosystems, etc. have undergone scrutiny for their societal benefit-cost

43 estimates and their effects on nonhuman biodiversity and ecosystem health. One human

44 activity that may once have been unobjectionable has undergone little scrutiny: hunting with  
45 free-running hounds loosed far from their owners.

46 In our search for work on hunting with dogs or hounds in Google Scholar, the search  
47 phrase 'hunt with (hound or dog)' yielded 38,300 results declining by half when '-bird' was  
48 added to the search string to exclude bird-hunting dogs. By contrast, 'hunt -bird' yielded 3.16  
49 million results. Therefore, it is under-studied. Current practitioners are also secretive, judging  
50 from their introduction of a bill in the Wisconsin state legislature to prohibit video-recording of  
51 the activity which is currently under appeal in federal court [1]. Yet, the practice of hunting  
52 mammals with hounds has been recorded since 8,000 years at least [2], praised by President  
53 Theodore Roosevelt in 1902 [3], and is legal in numerous countries and several U.S. states [4;  
54 5]. Despite its long history, loosing mammal-hunting hounds to pursue prey, some as large as  
55 bears, may have harmful effects on people in their path, on the hounds themselves, and on  
56 target and non-target wildlife they encounter or pursue [6; 7]. Therefore, we present data on  
57 reports by self-selected owners alleging harm to their hounds when loosed near wolves and  
58 perceptions of human by-standers self-reporting their experiences of hounds used for such  
59 hunting, as a way to begin filling in the picture of this poorly studied hunting method. Although  
60 a comprehensive examination of societal benefits-costs requires additional information on  
61 benefits and unbiased samples of both phenomena, these were beyond our scope.

62 Non-target animals and their interactions with hounds

63 When pets kill wildlife, biodiversity may diminish or ecosystem health may deteriorate  
64 [6; 7]. Dogs are potential predators of prey they can overcome. Larger size and greater  
65 competitive ability of the wild animals may alter the risk posed by hounds, just as the danger to

66 non-target animals may increase if hounds outnumber or outweigh them. Hounds are often  
67 used for pursuit of mammals larger than individual hounds, such as black bears. Black bears  
68 were reported to avoid such encounters and in so doing approach people and major roads  
69 more frequently [8]. Some animals will stand their ground when hounds encounter them. When  
70 hounds encounter larger wildlife or animals that can defend themselves effectively, the hounds  
71 may be injured.

72         Researchers have examined aggressive encounters between wolves and dogs in many  
73 regions [9; 10; 11]. The States of Wisconsin and Michigan, USA, have a relatively longer history  
74 of such research. Spatial patterns of wolf *Canis lupus* attacks on hounds are somewhat  
75 predictable [12; 13; 14; 15]. The risk of an attack appeared to be higher in areas with more  
76 public land, larger wolf packs, closer to a wolf pack, and when baits were left out longer. Here,  
77 we examined self-reports by owners on the characteristics of the hounds involved, and draw on  
78 anecdotal data provided by handlers to evaluate correlates of the outcomes of wolf-hound  
79 interactions (WHI).

80         At the time of our study, it was illegal for hounds to attack wild animals, but such attacks  
81 might have occurred anyway. We do not have evidence of which animal in a WHI initiated  
82 aggression or escalated it to the point of injury or death. We only present data on the outcomes  
83 for hounds because outcomes for wolves were not documented. Therefore, we cannot rule out  
84 the possibility that wolves responded defensively to hound attacks.

85         The evidence for wolf attacks on hounds came from handlers seeking compensation or  
86 other forms of redress [14; 16; 17]. In a prior study, a number of wolf deaths caused by other  
87 canids were invariably attributed to other wolves [18]. Yet, veterinary pathologists might not be

88 able to reliably distinguish large dogs such as hunting hounds from wolves by simple scrutiny of  
89 bite marks without DNA analysis [19]. Therefore, our sample is necessarily biased toward  
90 handler concerns and outcomes for hounds. This should not be construed as evidence that  
91 wolves were the aggressors or that wolves ended up unharmed by hounds.

## 92 Hounds and humans

93 Biodiversity may suffer after domestic animals are injured or killed, because their  
94 owners may react in several ways detrimental to nature protection efforts. Owners may  
95 escalate and kill one or more wild animals, following the incident or for years afterwards.  
96 Furthermore, resentments engendered by dangerous wildlife encounters can spread to  
97 associates of the involved humans and become broad-based attitudes of intolerance or even  
98 preemptive lethal actions against the wildlife. For instance, consider the history of social  
99 scientific work done by various authors measuring attitudes to wolves in Wisconsin [17; 20; 21;  
100 22; 23; 24]. The first survey in 2001 included complainants who believed they had experienced  
101 a wolf attack on their domestic animals, whereas the second survey in 2004 included many  
102 more individuals who had not experienced such losses, yet both groups showed decreases in  
103 tolerance for wolves when they were resampled in 2009. The interest group least tolerant of  
104 wolves was bear hunters who used hounds and the group whose tolerance for wolves declined  
105 most over time were men in wolf range who had hunting experience, not those with personal  
106 experience of wolf attack on domestic animals [17; 21; 22; 23; 24]. The prior results on  
107 tolerance were paralleled by inclinations to kill wolves illegally [20; 22; 23]. Also, attitudes to  
108 wolves and inclination to kill wolves illegally were unrelated to the hound handler's own  
109 experience with wolves or their experience with policy interventions relating to WHI such as

110 compensation for hound injuries [22; 23]. Handlers reported concerns for safety of the hounds  
111 and also concerns with access to land and their ability to pursue this pastime in the face of  
112 public and political opposition [20]. Recent research reports that poaching of wolves peaked  
113 during seasons of hunting bears and deer and seasons of training hounds [25]. There are no  
114 published data on hound-handler's encounters with by-standers or the encounters between  
115 their hounds and bystanders. Nor do we have data on the views of by-standers who encounter  
116 hounds or their handlers.

117         The Sierra Club Wisconsin Chapter (SCWC) began to fill the gap with the survey we  
118 report here. As part of a National Sierra Club initiative, the SCWC subcommittee, Protecting  
119 Native Forests and Wildlife, discussed the first-hand reports members had received of citizens  
120 and land owners experiencing encounters with hounds and their handlers. Because such first-  
121 hand reports are likely to be remarkable, most reports were adverse. The committee requested  
122 information from local law enforcement in the counties from which reports came to CVWVC  
123 and also the Wisconsin Department of Natural Resources (WDNR) for incident report data. They  
124 were informed by both agencies that "no such data were recorded." So, thereafter SCWC  
125 members led an effort at gathering information more broadly and systematically.

126         Hunting with hounds has long been controversial and questioned by hunters addressing  
127 the ethics of hunting and non-hunters addressing the public policy and morals of such practices  
128 [13; 26; 27]. Therefore, as a first step in shedding light on the practice, we examine self-reports  
129 of handlers reporting hound-wolf interactions and self-reports from human-human interactions  
130 involving hound handlers their hounds and by-standers. In our Discussion, we address what  
131 self-selection bias implies for the generality of our findings.

132 **MATERIALS AND METHODS**

133 Wolf-hound interactions (WHI)

134           During our study period, hounds were legally used to hunt many mammals, including  
135 smaller carnivores and black bears. Bear hunting in Wisconsin occurred from September and  
136 October, and hound training was legal in July and August [17; 28]. Hound hunters accounted for  
137 approximately 40% of the annual take by bear hunters [13; 28]. Typically hounds were loosed  
138 from vehicles and allowed to run far from owners, without control [12]. Hounds were often  
139 fitted with global positioning systems (GPS) or VHF radio-collars, allowing the owner to follow  
140 remotely the movements of hounds and determine when and where a bear had been treed.  
141 Hunters used groups of up to 6 hounds to track and trail prey during training or hunting [12].

142           We examined WDNR case files on WHI maintained by the Bureau of Natural Heritage  
143 Conservation from 7 August 1999 through 19 January 2012. Case files documented 145 killed  
144 and 31 injured hounds identified as confirmed or probable WHI. We believe most WHI incidents  
145 were reported because of a compensation program characterized as more generous than other  
146 jurisdictions[17; 22]. Bump et al. [15] suggest fewer WHI are reported in Michigan's wolf range  
147 because hound owners receive no compensation. Owners with confirmed losses were eligible  
148 to receive up to \$2,500 per hound based on the estimated value of the hound. Since the  
149 compensation program began in 1985, nearly \$350,000 dollars were paid to hunters to  
150 compensate for hounds injured or killed by wolves. Between 1985 and 2006, payments for  
151 hunting hounds comprised 37% of all compensation [14; 16; 17; 22]. WDNR provided  
152 compensation for domestic animals injured or killed by wolves, including hounds [14; 16; 17].

153 United States Department of Agriculture agents assumed responsibility for verifying WHI in  
154 1990, and conducted most of the investigations used in our analysis of WHI [29].

155 WHI case files included written reports and forms documenting field investigations,  
156 including necropsy data, photos, veterinary reports, and anecdotal reports by handlers. During  
157 the early years of record-keeping, documentation and reporting of depredations lacked  
158 uniformity; thus, some portions of the data were missing, resulting in lower sample sizes for  
159 various analyses. We limited our analysis of WHI to hounds used to hunt bears, bobcats, or  
160 coyotes. A total of 91% of WHI occurred while pursuing these species, which involves different  
161 breeds and use of hounds than for other quarry, such as waterfowl, upland birds, or rabbits.  
162 Hounds that hunt large prey such as bears or coyotes are typically breeds of a similar large size  
163 and build, frequently Walker, Plott, Redbone, or Coon hounds. Occasionally, WHI files did not  
164 specify the type of prey being pursued. In these cases, if the breed of dog was a Walker or Plott  
165 hound, we assumed the WHI occurred while pursuing the above three wildlife species. In total,  
166 we report on 176 case files. We quantified the frequency of WHI among breeds of hounds. If  
167 the hound was reported as a mix of multiple breeds, we used the first breed listed. We pooled  
168 breeds in an “other” category when a single breed had too few WHI to meet the assumptions of  
169 the *chi*-squared test. No data are available on breed frequencies or preference by hunters in  
170 Wisconsin, with which we could estimate relative risk by breed.

171 Our analysis of the body site bitten was limited because a number of hound carcasses  
172 were partially or wholly consumed before retrieval by an owner arriving late at the scene. We  
173 pooled head, neck, and throat into one category and all other sites in another category, to test  
174 if outcomes of WHI differed by bite site.



175 We compared hound group size, number of hounds involved in the WHI, and wolf pack  
176 size using 1) number of wolves seen and reported by hunters (observed), and 2) WDNR-  
177 reported wolf pack sizes from the winter preceding the WHI (censused). Because wolf packs  
178 exhibit fission-fusion sociality and packs disaggregate, particularly in the summer when many  
179 WHI occurred. Finally, we analyzed the temporal occurrence of WHI as it relates to public  
180 hunting seasons, and we compared the frequency of WHI during the hound-training period  
181 (July-August) to that during the bear-hunting season (September-October).

182 We performed statistical analyses [30] using Student's paired *t* tests to compare the  
183 differences in average estimated ages of hounds and numbers of wolves during the attack, in  
184 relation to the outcome of the WHI (i.e., killed or injured) after evaluating if variances were  
185 equivalent (*F* test). All statements of statistical significance are based on  $P \leq 0.05$ . We used  
186 Spearman rank correlations to detect associations between multiple continuous variables.  
187 Survey

188 As part of a National Sierra Club initiative, the Wildlife Committee (SCWC)  
189 subcommittee on Protecting Native Forests and Wildlife, discussed the first-hand reports  
190 members had received of citizens and land owners experiencing adverse encounters with  
191 hunting hounds and their handlers. The SCWC decided to collect more systematic information  
192 from a broader region than the former anecdotes. The SCWC led and posted the survey on the  
193 Sierra Club Wisconsin Chapter website through 2015-2021, and administered the survey. The  
194 survey appeared at <https://www.sierraclub.org/wisconsin/protecting-native-forests-wildlife>.  
195 We designed the survey of self-selected respondents in 2015 to elicit data concerning such

196 incidents while preserving the anonymity of the respondents. We analyzed anonymized data  
197 stripped of identifying information by the SCWC administrators.

198           The 25-question survey (Supplementary Material Appendix 1) is organized in four  
199 sections: Observations; Trespass; Property Damage, Personal Injury or Threats; and Interactions  
200 with Law Enforcement, totaling 22 yes/no questions and 4 items that allowed unstructured  
201 responses by respondents to elaborate on their answers. SCWC members also printed hard  
202 copies of the instrument and distributed these at wolf and wildlife related meetings and  
203 conferences in Wisconsin in 2015 and 2016. SCWC also invited citizens who described adverse  
204 hounding encounters to fill the online report. About 80% of respondents used the online form  
205 to report anonymously, and 20% sent their responses directly to SCWC via mail, phone, email,  
206 or in person while being assured of anonymity. We collated data stripped of identifying  
207 information.

208           LM screened the sample to eliminate responses which identified no adverse incident  
209 involving hunting hounds, as these respondents generally used the report format to express an  
210 opinion about the practice of hunting with hounds, which we did not analyze because it was  
211 outside the purview of this survey ((Supplementary Material Appendix 2). We screened for  
212 multiple reports of the same incident with identifying factors such as location and date. After  
213 the screening, the sample presented here appears to come from independent incidents  
214 although we had no way to verify location or date. Respondents could identify county of  
215 residence and interaction, if different. Respondents were asked how many hounds they saw  
216 during each interaction they reported. When two respondents mentioned the same interaction  
217 but different numbers of hounds, LM averaged and rounded up for the number of hounds.

218           The University of Wisconsin-Madison Institutional Review Board does not define this  
219 type of research as research on human subjects because data were collected by a third party  
220 (SCWC web master) and the de-identified data were provided to the authors.

221

## 222 **Results**

### 223 Wolf-hound interactions (WHI)

224           In 176 case files, we found 140 independent WHI during our study period, where a case  
225 reported on the same day and location by different owners were pooled into one WHI. Files  
226 reported 145 killed (83%) and 31 injured (17%) hounds. The high percentage of fatalities might  
227 reflect those owners sometimes took hours to find a distant hound. Therefore, sub-lethal  
228 injuries might not be attributed to a WHI if owners arrived long after it ended or WHI escalated  
229 to fatal outcomes when humans did not intercede for long periods. Wolf injuries and deaths in  
230 WHI were not documented nor reported in case files.

231           Neither sex nor age of the hounds was associated with the outcome of WHI (sex  $X^2 =$   
232 1.32,  $P = 0.25$ ,  $df = 1$ ,  $n = 151$ ; age  $t = -0.71$ ,  $P = 0.49$ ; variances were equal  $F = 0.49$ ). The  
233 Treeing Walker Coonhound was the most common breed in WHI (33.3%,  $n = 51$ ), followed by  
234 the Plott (27.5%,  $n = 42$ ). There was a significant association between breed and outcome,  
235 categorized as either injury or death ( $X^2 = 10.7$ ,  $P = 0.03$ ,  $df = 4$ ,  $n = 176$ ). Notably, the Plott  
236 fatality frequency of 95.4% was higher than the average 81.2% (Table 1). In total, 89% of WHI  
237 occurred while hunters reported pursuing black bears *Ursus americanus* (bobcat *Lynx rufus* 6%,  
238 coyote *C. latrans* 4%, raccoon *Procyon lotor* 1%). However, we lack independent data on the  
239 animal being pursued by those hounds at the time of WHI and also lack the relative frequencies

240 statewide of targeting each species with hounds. There was no association between the  
241 outcome of WHI and the prey being pursued by hunters ( $\chi^2 = 1.9, P = 0.75, df = 4, n = 140$ ). The  
242 bear-hound-training period (July–August) accounted for 62% of WHI, whereas the bear-hunting  
243 season (September–October) accounted for 28%. Outcomes were not associated with month  
244 ( $\chi^2 = 8.5, P = 0.38, df = 8, n = 176$ , Table 1).

245 An average of 1.3 hounds were injured or killed per WHI (maximum 5 in a single WHI).  
246 The average size of the hound group (3.8 *SD* 1.4,  $n = 57$ ; only 3 or 5% of those WHI reported to  
247 involve a single hound in the handler's care) or the number involved in the WHI (2.6 *SD* 1.3,  $n =$   
248 47 with 9 or 19% of those WHI reported to involve only 1 dog) was similar to the number of  
249 wolves observed by hunters (2.9 *SD* 1.2,  $n = 15$ ), the census pack size for the pack blamed by  
250 the state or federal agent tasked with verifying the report (2.4 *SD* 1.0,  $n = 19$ ); or the last two  
251 estimates combined (2.6 *SD* 1.1,  $n = 30$ ;  $n = 4$  included information for both observed and  
252 censused). The outcomes were not associated with the number of hounds, number of wolves,  
253 or difference between the two in a given WHI by any of the measures of group size or pack size  
254 above (Welch test assumes unequal variance,  $F < 0.72, P > 0.41$  in every test). Wolves injure for  
255 killed hounds in groups with superior numbers in 44% of WHI with such data ( $n = 16$ ).

256 Our analysis on hound body site bitten was limited to 109 WHI. We cannot be certain  
257 that wolves inflicted every bite. Of the 109 carcasses with bite information, 50 provided one  
258 bite location (46%), 37 provided two locations (34%), and 22 provided 3 or more locations  
259 (20%). Taking all bite locations ( $n = 193$ ), the single most frequent bite site was the neck (33%),  
260 followed by back (17%), upper thigh (12%), and chest (10%). We considered bites to the head,  
261 shoulders, neck (as opposed to throat), back, and upper thighs as indicative the hound had

262 been lower than its attacker. Those upper body parts were represented in 72% of the 193 bites  
263 whereas under-parts (throat, groin, sternum, ribs, lower legs, abdomen) were represented in  
264 28% of bite locations. We found no relationship between body site bitten and outcome, when  
265 we separated neck and head bites from others ( $X^2 = 1.5$ ,  $P = 0.22$ ,  $df = 1$ ,  $n = 66$ ). Of 80 deaths  
266 with data on consumption of a carcass, 49% of hound carcasses were partially consumed. Of  
267 those 80 hounds consumed by wolves, 71% occurred July–August and 27% in September–  
268 October.

269           Precautions, such as avoidance of rendezvous sites and use of bells on collars were  
270 difficult to evaluate, because of a lack of data on these potentially preventive methods  
271 employed by handlers. Allegedly, 11% of hounds in WHI wore bells on their collars ( $n = 20$ ), but  
272 the use of bells was not reported in the majority (69%) of the cases.

### 273 Survey

274           105 respondents reported adverse incidents with hunting hounds from 51 Wisconsin  
275 counties, 4 Michigan counties, 5 counties from other states, and seven who declined to specify  
276 location. The 105 respondents reported 119 separate incidents (Table 2). The average number  
277 of incidents per county was 2.

278           Of the 105, 42% reported the hounds observed were not accompanied by a handler and  
279 41% reported finding abandoned or lost hounds on their property. In those cases, some  
280 respondents reported contacting local animal shelters, law enforcement or handlers via phone  
281 numbers on collars.

282 Overall, 63% of 105 respondents described incidents of trespass including hounds  
283 running on their property without permission, handlers found on property without seeking  
284 permission, or running hounds on property after being denied permission.

285  
286 Beyond trespass, 18% of respondents described illegal or nuisance behavior: damage to  
287 property caused by hounds, including downed fencing, damaged landscaping and gardens,  
288 injury to self and livestock, dead wildlife left on property, vandalism or litter. Most seriously,  
289 11% reported injury to pets or livestock by hounds, although 24% reported direct knowledge of  
290 hounds attacking others' pets or livestock, and 8% describe direct encounters with hounds  
291 resulting in personal injury or being chased. Also 31% reported threatening altercations with  
292 hound handlers, including being unwillingly detained by hound handlers' trucks on public roads,  
293 or their own private driveways. Of 105 respondents, 51% of respondents reported they "feel  
294 intimidated by hound handlers," and 44% feared retaliation from handlers for reporting  
295 confrontations to law enforcement.

296 Overall, 36% of 105 respondents believe a conflict of interest between law enforcement  
297 officers, including game wardens, and the practice of hound hunting existed, either because of  
298 relationships between law enforcement officers and handlers, or because the officers were  
299 believed to hunt with hounds themselves. Respondents describe being given false information  
300 by law enforcement officers, including local sheriffs and game wardens, and also reported filing  
301 official complaints upon which no discernible action was taken.  
302 Comparing numbers of hounds from WHI and survey data

303 Survey respondents reported 2–8 hounds per interaction (average 3.7, mode 2). That  
304 average is identical to the average number of hounds that handlers reported in their pack in  
305 WHI above. This seems to be corroborating evidence of accuracy in both datasets, as neither  
306 set of complainants was aware of the other. Given the rarity of single hounds (5%) in WHI, the  
307 bystander reports of >1 hound seem unsurprising. Similarly, bystanders reported >6 hounds in  
308 3 events (8% of reports that include these data) but handlers never reported >6 in their pack  
309 after a WHI. The legal limit per handler was 6 hounds but multiple handlers may release more  
310 than 6 hounds.

## 311 **DISCUSSION**

312 We analyzed two datasets collected on the practice of hunting mammals with hounds.  
313 The records came from self-selected complainants, from handlers reporting wolf-hound  
314 interactions (WHI) that resulted in injury or death of hounds, and reports from bystanders who  
315 experienced adverse encounters with handlers or hounds. We report fighting between small  
316 parties of hounds and small parties of wolves. We report illegal activities alleged by bystanders  
317 exposed to free-running hounds or their handlers. We report allegations of negligence or  
318 complicity by law enforcement officials responding to allegations about handlers or hounds.  
319 Hounding is a poorly studied practice. (See Introduction), which deserves more attention in  
320 light of these reports.

321 Regarding hounds, over 83% of Interactions between wolves and hounds (WHI) were  
322 fatal for hounds, similar to 71% and 82% reported in Nordic countries [9; 31]. No data were  
323 collected on harm to Wisconsin wolves from WHI. A majority of WHI affected hounds pursuing  
324 black bears compared to other prey. However, no information was available to evaluate if

325 hounds were distracted from bear stimuli by other wildlife, such as wolves. Outcomes of WHI  
326 (injury or death of hounds) were not associated with the number of wolves observed or  
327 censused near the site, or the numerical differences between wolves and hounds, hound age or  
328 sex, the species of prey targeted by hunters, or the month in which WHI occurred.

329

330 Small body size, vocalizations, and numerical superiority have all been implicated in the  
331 risks and fatalities associated with WHI [9; 10; 11; 32]. Plott hounds, the smallest hound breed  
332 commonly used in Wisconsin, experienced a higher proportion of fatal outcomes than other  
333 breeds (Table 1). In addition to the small size of Plott hounds, this breed is also known for its  
334 baying vocalizations, which might alert wolves from a long distance. Similar risks of dog  
335 vocalizations were reported in Nordic countries [9; 11]. Small size may make a hound more  
336 vulnerable to head and neck bites. Bites to the neck were associated with higher fatality rates in  
337 a Scandinavian study [9]. Bites to hound carcasses were predominantly to the upper body in  
338 this study (72%) and of those the neck predominated. Numerical superiority has also played a  
339 role in the outcomes of aggression between canids. For example, aggression between wolves  
340 and coyotes in Yellowstone National Park had fatal consequences when wolves outnumbered  
341 the smaller coyotes, but not when coyotes outnumbered wolves, suggesting that group size  
342 exerted less influence than individual body size differences in determining outcomes between  
343 canids [33; 34]. However, we did not find clear effects of numerical superiority in WHI. Perhaps  
344 the large group sizes of hounds in Wisconsin and uncertainty about the number of wolves  
345 involved both obscured associations between numerical superiority and outcomes of WHI.



346 We found equivocal support for the predation hypothesis (WHI occur when wolves  
347 attack hounds for food) or the territoriality hypothesis (WHI occur when wolves defend  
348 territory or pups) [12; 14]. The timing of WHI presents equivocal evidence for both hypotheses.  
349 Higher frequencies of WHI occurred during the hound training period in July and August than  
350 during the autumn black bear hunt in September and October. Elevated risk in July and August  
351 might have been associated with the practice of baiting, as wolves visit bear bait sites in search  
352 of food [15]. In Wisconsin, bear bait sites could be legally established as early as April, and could  
353 last the entire wolf pup-rearing season. Bump et al. [15] documented that the risk of WHI was  
354 three to seven times greater in Wisconsin than in adjacent Michigan, citing the extended bear-  
355 baiting period as a probable cause for the much higher risk of WHI in Wisconsin. That might  
356 support the predation hypothesis. However, bear baiting was confounded with wolf pup  
357 defense. The hound training period coincided during the study with wolf use of rendezvous  
358 sites or den sites. During this time, most wolf pack members return periodically to rendezvous  
359 or den sites to assist with pup-rearing, and consequently have higher food demands, perhaps  
360 requiring wolves to forage more frequently [35]. From birth until the end of August, wolf pups  
361 experience the highest growth rates, with September representing a critical month for weight  
362 gain [36]. In some cases, wolf pups have been observed gaining as much as 3.6 pounds per  
363 week [37]. Pup growth, critical to survival, is limited by food quality and availability. By late  
364 August, growth begins to taper [38], as does rendezvous site use [35; 36; 37]. The consumption  
365 of hound carcasses might corroborate the predation hypothesis, but that is not persuasive  
366 because consumption was recorded in only approximately half of the WHI and we do not know  
367 if the wolves that attacked were the consumers. Nor can we rule out that consumption

368 followed after the primary motivation for aggression. The hound carcasses and bite locations  
369 provided limited insight. Bites to head, neck, and throat represented 41% of bite locations on  
370 hound carcasses. The predation hypothesis might find support from this result because cranio-  
371 cervical killing bites are associated with predation by many mammals [39; 40]. Furthermore, a  
372 greater number of hounds might have been afield in July and August than other months. In  
373 sum, we find equivocal support for both hypotheses. This could imply both are correct or we  
374 are missing information, such as whether the hounds initiated the attack not the wolves or the  
375 body conditions of all involved.

376         The state wildlife agency implemented several methods for mitigating or preventing  
377 WHI, including compensation for handlers' self-reported losses, encouraging the use of bells or  
378 beepers on collars to deter wolves, and statewide communication to hunters on recent hound  
379 injuries and their locations, and designation of Wolf Caution Areas (WCA). We discuss each of  
380 these policy interventions in turn.

381         Compensation programs did not clearly reduce WHI rates. Much scholarly discussion has  
382 focused on the moral hazard (In short, negligent owners have no incentive to protect their  
383 animals if they will be paid for losses.) that can be triggered by compensation after the fact.  
384 Prior research on Wisconsin's compensation program addressed moral hazards [17; 22]. The  
385 state only changed the source of the funds, not the conditions for payment since that work was  
386 published. Therefore, cooperation of the state legislature may be essential to changing an  
387 incentive for WHI to occur into a disincentive for hounds and non-target animals to be put at  
388 risk. We recommend no compensation be paid without evidence that handlers were taking  
389 preventive actions.

390

391            Handlers may be able to prevent WHI by using protective vests or stronger collars [9;  
392 41], keeping hounds leashed until the targeted game species is located, or bringing first aid kits  
393 on the hunt, although the possible effect of these interventions has not been studied in  
394 Wisconsin. Regarding devices, 38 percent of hounds in WHI case files allegedly wore bells on  
395 their collars ( $n = 53$ ), but we have no data on the use of bells among hounds that did not enter  
396 the WHI database. Outcomes were not associated with hunter self-reports of affixing bells to  
397 collars. Nevertheless, we recommend the state obligate veterinary clinics that treat hounds for  
398 wildlife injuries report each such incident so the welfare of hounds and preventive actions  
399 taken by handlers can be evaluated by professional veterinary ethical boards and hunting ethics  
400 boards wherever such exist.

401            Another step handlers might take to protect hounds and wolves would be to release  
402 hounds in low-risk areas. The state communicated the location of higher-risk WCAs online,  
403 posted in the field, and in other ways to handlers [12; 13]. Within WCAs, the WDNR  
404 recommended that bear hunters release hounds >2 miles from known rendezvous sites. WHI  
405 case files and prior work documented handlers' willingness to risk dogs in posted WCAs, even  
406 within the same season and even within hours of previous WHI or WCA posting [12; 13].  
407 Compensation records also document multiple payments to the same owner or handler within  
408 a single season [17]. These data suggest not all hunters heeded the state's warnings. Some have  
409 speculated that some unscrupulous handlers purposefully ran hounds in WCAs as a way to reap  
410 compensation payments for old, injured, or unskilled hounds or as a way to find and kill wolves  
411 illegally. Cooperation by hound owners seem essential to these interventions. However, our

412 survey data suggest a number of handlers would resist such cooperation even to the point of  
413 breaking the law.

414         Prior research studies report that hound handlers as a group contain a substantial  
415 contingent willing to break the law and flout regulations intended to protect animals and more  
416 so than other groups active in wolf range. This hypothesis is supported by independent lines of  
417 data on intentions to poach [20; 23; 42]. Actual poaching evidence is consistent. That  
418 component of wolf-poaching that involves concealment or destruction of evidence, which  
419 reflects intent to break the law, has repeatedly risen in incidence along with policies that permit  
420 some legal wolf-killing in several US wolf populations. These findings indicate that would-be  
421 poachers profit from governmental laxity to act unlawfully or that would-be poachers use the  
422 cover of legal hunting to act unlawfully [43; 44; 45; 46]. Most recently, researchers found that  
423 cryptic poaching rose during hound training, bear-hunting seasons, and deer-hunting seasons  
424 [25]. The 2021 Wisconsin wolf-hunt that allowed hunters to use hounds to pursue wolves in  
425 deep snow saw the most rapid season closure and over-kill in Wisconsin wolf management  
426 history with 218 wolves killed in an ostensibly legal fashion in less than 72 hours with >80%  
427 being killed by hunters using hounds. Unpublished necropsy data collected by the Great Lakes  
428 Indian Fish & Wildlife Commission indicate hounds delivered potentially lethal bites during  
429 those hunting incidents, which represent unlawful take by hunters [47]. To our knowledge, no  
430 hunter has yet been prosecuted for such incidents.

431         The survey data we present come from an instrument designed to elicit specific reports  
432 of the types of adverse incidents that were being anecdotally reported to the Sierra Club  
433 Wildlife Committee (SCWC). Although an online, self-selected sample cannot be used to

434 extrapolate rates, frequencies, or representativeness in space, time, or demography, still the  
435 reports suffice to identify a problem that is seemingly not being addressed by wildlife law  
436 enforcement or regular police. The alleged criminal infraction include trespass, vandalism,  
437 accidental destruction of property including with vehicles that left the scene, harassment,  
438 intimidation, and alleged corrupting influences on government law enforcement and wildlife  
439 agents. These allegations demand investigation, at least for the more serious infractions, we  
440 recommend compensation payments end forever and hunting licenses of any kind be revoked  
441 for handlers convicted of crimes during hunting with hounds.

442         In wildlife law, the US Endangered Species Act (ESA) and federal court cases surrounding  
443 it make clear that some hound handlers are vulnerable to prosecution. First, any “take”  
444 (including harassment, pursuit, injury, killing, etc.) is prohibited under the ESA regardless of  
445 whether the perpetrator knew the wild animal harmed was listed [48]. From the standpoint of  
446 wolves and other threatened or endangered species (listed species hereafter; note that wolves  
447 were not legal game during our study), systematic data on hound injury to listed species are  
448 lacking to evaluate if hound-induced harassment or injury are a predictable risk from hounding.  
449 The absence of data revealed by this study indicates that hounding is not adequately regulated.  
450 Because wolves were often a federal- or state-listed species during our study and yet WHI  
451 occurred with likely injury to wolves, the practice of hounding in wolf pack territories should be  
452 prohibited when wolves are a listed species. Prohibitions on non-selective killing methods in the  
453 range of endangered species and prohibitions on hunting non-listed species of similar  
454 appearance such as coyotes *C. latrans* [49], are overdue in our view. For example, c coyote  
455 hunting was closed in northern game management units of Wisconsin for 33 years (1980-2013

456 [https://dnr.wi.gov/topic/WildlifeHabitat/documents/reports/graphs/wildhar\\_sum.pdf](https://dnr.wi.gov/topic/WildlifeHabitat/documents/reports/graphs/wildhar_sum.pdf)) but the  
457 practice was discontinued with the administration of Secretary Stepp. Therefore, we call for a  
458 moratorium on hounding until the proper research is done by independent scientists to validate  
459 the claim that hounding (or any hunting method) is adequately regulated [50] and therefore  
460 lawful in the range of any federally listed species.

461 Potential legal jeopardy does not stop at the hound handlers. Given the state wildlife  
462 agency and law enforcement refused the SCWC request for information or had no such  
463 documents, we recommend state and county authorities revise policies. For one, some of the  
464 infractions may still be within the statute of limitations and secondly, failure to investigate can  
465 make a department vulnerable to lawsuits and the imposition of oversight by higher authorities  
466 (e.g., federal consent decrees). A law enforcement agency that fails to investigate or  
467 systematically fails to prosecute complaints of illegal activity opens itself up to a legal challenge.  
468 Legal jeopardy arises for the agency because the doctrine of prosecutorial discretion may not  
469 protect a law enforcement agency from charges of systematic neglect of unlawful activities [48]  
470 and see allegations of such systematic neglect in a case involving wolves [51].

471  
472 Online surveys to collect information on illegal activities with specific date, location, and  
473 circumstances, might support improved law enforcement and wildlife protections. We believe  
474 the ability to preserve anonymity was integral to the effectiveness of the survey as a vehicle to  
475 report these adverse incidents, especially in light of the low confidence evinced in law  
476 enforcement by respondents. By contrast, our other self-selected data set (handler complaints  
477 of hound losses in WHI) were motivated by a compensation program that paid for injured or

478 dead hounds. That program also seems to need reform given that no information on harm to  
479 wolves was collected and it might be impossible to verify that the handlers or hounds were  
480 acting lawfully at the time of the WHI. These results highlight a need for improved regulation,  
481 greater oversight and more energetic enforcement of activities involving the use of dogs during  
482 hunting on private and public lands.

483         A common bias in discussions of hunting, wildlife management, and the power politics  
484 between consumptive users and non-consumptive users is the notion that hunters have lay  
485 knowledge gained through local experience and expertise in their practices. This often plays out  
486 among academics and manager-authors as favoring the views and preferences of local  
487 communities and of hunters over others, especially outside experts [52; 53; 54]. But that  
488 assumption is flawed in two ways by its notion of expertise. First, sometimes two local, lay  
489 types of expertise are pitted against each other as in an unknown proportion of our data when  
490 hound handlers and the bystanders complaining about them were equally local and held  
491 equivalent, lay expertise. The second flaw is when the lay bystanders complained to law  
492 enforcement experts about hounds or handlers, then the power asymmetry is reversed from  
493 the usual academic debate. In short, the local, lay expert complainant deserves the attention  
494 and compassion typically reserved for local hunters. Therefore, we call for more just and fair  
495 consideration of the under-represented and marginalized in wildlife management.

496         The number of adverse events -- hounds injured or killed, the number of bystanders  
497 who alleged harm or illegal activities by hounds or handlers, and the general gap in information  
498 about harms to non-target species, especially listed ones -- all point in the same direction. This

499 practice inflicts ills that society has long ago deemed unlawful, cruel, and harmful to many  
500 fundamental public interests.

501 Finally, we address the organizing theory of interest to the editors of this special  
502 research topic on the evolution and domestication of dogs. Although present-day practices may  
503 bear no relationship to the origins of dog domestication in early human societies, we feel two  
504 aspects of our research are relevant. First, our research exposes the ecological costs of hounds  
505 to other animals including humans in terms that may have ancient roots. Those costs may have  
506 ancient roots to the extent that harassment, injury or death of humans and other animals, wild  
507 or domestic, caused by free-running dogs may be as ancient as any interactions between  
508 humans and dogs. Second, individual humans who are nominally of the same society yet  
509 probably belong to different interest groups within that society – namely hound-hunters and  
510 the complainants we highlighted – may experience very different costs and benefits of the use  
511 of dogs for hunting or companionship. Previously, AT discussed this clash of benefits and costs  
512 in the context of aggressive dogs, preventing wolf-dog hybridization, and control of dog fertility  
513 [55]. Given the current empirical evidence, we suggest a refinement of any hypothesis for the  
514 origins of domestic dogs. We assume no society has ever had a homogeneous view of dogs or  
515 the benefit minus cost balance of dogs. This is perhaps a truism so we go beyond it to argue  
516 that the influential elite will have a disproportionate say in the role of dogs in any society. If the  
517 elite or dominant class of humans in society experiences net positive effects of dogs, then the  
518 roles of those dogs are expected to proliferate and new functions for them will be found by the  
519 beneficiaries. If on the other hand, the elite experience net costs then we predict dog  
520 domestication and use would be stifled and find only marginal, limited expression within that



521 society. Therefore, we doubt the search for a unitary explanation for the origin of domesticated  
522 dogs will bear fruit until the first site of proto-dog evolution can be confirmed (as attempted for  
523 example by [56; 57; 58]). Then, the evolution and human perceptions of the roles of dogs in that  
524 society might be determined from other archaeological evidence if we are lucky. Those  
525 preconditions seem unlikely at present. Therefore, we suggest the search for functional  
526 evolutionary explanations for the domestication of dogs instead search for multiple loci and foci  
527 of human-dog interaction, Once the loci are identified perhaps zoo archaeologists and  
528 anthropologists can collaborate to understand the local ecological benefits minus costs  
529 associated with dogs at that site and among those people and their other wild and domestic  
530 animals.

#### 531 References

- 532
- 533 [1] Brown, J. et al. v Kemp, J. et al., U.S. Court of Appeals, 7th circuit, 2021.
- 534 [2] M. Guagnin, A.R. Perri, and M.D. Petraglia, Pre-Neolithic evidence for dog-assisted hunting  
535 strategies in Arabia. *Journal of Anthropological Archaeology* 49 (2018) 225-236.
- 536 [3] T.D. Roosevelt, *Hunting the Grisly and Other Sketches*, G. P. Putnam's Sons, New York, 1902.
- 537 [4] H. Hristienko, and J.E.J. McDonald, Going into the 21st century: a perspective on trends and  
538 controversies in the management of the American black bear *Ursus* 18 (2007) 72-88.
- 539 [5] T.A. Heberlein, The gun, the dog and the thermos: Culture and hunting in Sweden and the  
540 United States. *Sweden & America Fall 2000* (2000) 24-29.
- 541 [6] M.E. Gompper, *Free-ranging dogs and wildlife conservation*, Oxford University Press.,  
542 Oxford, 2013.

- 543 [7] S. Grignolio, E. Merli, P. Bongi, S. Ciuti, and M. Apollonio, Effects of hunting with hounds on  
544 a non-target species living on the edge of a protected area. *Biol. Conserv.* 144 (2011)  
545 641-649.
- 546 [8] M. Stillfried, J. Belant, N. Svoboda, D. Beyer, and S. Kramer-Schadt, When top predators  
547 become prey: Black bears alter movement behaviour in response to hunting pressure.  
548 *Behav. Processes* 120 (2015) 30-39.
- 549 [9] J. Backeryd, Wolf attacks on dogs in Scandinavia 1995-2005, Ecology Institute, Swedish  
550 University of Agricultural Sciences, Grimso, 2007.
- 551 [10] S.H. Fritts, and W.J. Paul, Interactions of wolves and dogs in Minnesota. *Wildl. Soc. Bull.* 17  
552 (1989) 121-123.
- 553 [11] S. Kaartinen, M. Luoto, and I. Kojola, Carnivore-livestock conflicts: determinants of wolf  
554 (*Canis lupus*) depredation on sheep farms in Finland. *Biodivers. Conserv.* 18 (2009) 3503-  
555 3517.
- 556 [12] A.P. Wydeven, A. Treves, B. Brost, and J.E. Wiedenhoef, Characteristics of wolf packs in  
557 Wisconsin: Identification of traits influencing depredation. in: N. Fascione, A. Delach,  
558 and M.E. Smith, (Eds.), *People and Predators: From Conflict to Coexistence*, Island Press,  
559 Washington, D. C., 2004, pp. 28-50.
- 560 [13] E.R. Olson, A. Treves, A.P. Wydeven, and S. Ventura, Landscape predictors of wolf attacks  
561 on bear-hunting dogs in Wisconsin, USA. *Wildl. Res.* 41 (2014) 584-597.
- 562 [14] A. Treves, R.L. Jurewicz, L. Naughton-Treves, R.A. Rose, R.C. Willging, and A.P. Wydeven,  
563 Wolf depredation on domestic animals: control and compensation in Wisconsin, 1976-  
564 2000. *Wildl. Soc. Bull.* 30 (2002) 231-241.

- 565 [15] J.K. Bump, C.M. Murawski, L.M. Kartano, D.E. Beyer, and B.J. Roell, Bear-Baiting May  
566 Exacerbate Wolf-Hunting Dog Conflict. PLoS ONE 10.1371/journal.pone.0061708 (2013).
- 567 [16] D.B. Ruid, W.J. Paul, B.J. Roell, A.P. Wideven, R.C. Willging, R.L. Jurewicz, and D.H. Lonsway,  
568 Wolf–human conflicts and management in Minnesota, Wisconsin, and Michigan. in: A.P.  
569 Wydeven, T.R. Van Deelen, and E.J. Heske, (Eds.), Recovery of Gray Wolves in the Great  
570 Lakes Region of the United States: An Endangered Species Success Story, Springer, New  
571 York, 2009, pp. 279-295.
- 572 [17] A. Treves, R.L. Jurewicz, L. Naughton-Treves, and D. Wilcove, The price of tolerance: Wolf  
573 damage payments after recovery. Biodivers. Conserv. 18 (2009) 4003–4021.
- 574 [18] A. Treves, J.A. Langenberg, J.V. López-Bao, and M.F. Rabenhorst, Gray wolf mortality  
575 patterns in Wisconsin from 1979 to 2012. J. Mammal. 98 (2017) 17-32.
- 576 [19] L. Plumer, T.n. Talvi, P. Männil, and U. Saarma, Assessing the roles of wolves and dogs in  
577 livestock predation and suggestions for mitigating human-wildlife conflict and  
578 conservation of wolves. Conserv. Genet. <https://doi.org/10.1007/s10592-017-1045-4>  
579 (2018).
- 580 [20] C. Browne-Nuñez, A. Treves, D. Macfarland, Z. Voyles, and C. Turng, Tolerance of wolves in  
581 Wisconsin: A mixed-methods examination of policy effects on attitudes and behavioral  
582 inclinations. Biol. Conserv. 189 (2015) 59–71.
- 583 [21] J. Hogberg, A. Treves, B. Shaw, and L. Naughton-Treves, Changes in attitudes toward  
584 wolves before and after an inaugural public hunting and trapping season: early evidence  
585 from Wisconsin’s wolf range. Environ. Conserv. 43 (2015) 45-55.

- 586 [22] L. Naughton-Treves, R. Grossberg, and A. Treves, Paying for tolerance: The impact of  
587 livestock depredation and compensation payments on rural citizens' attitudes toward  
588 wolves. *Conserv. Biol.* 17 (2003) 1500-1511.
- 589 [23] A. Treves, L. Naughton-Treves, and V.S. Shelley, Longitudinal analysis of attitudes toward  
590 wolves. *Conserv. Biol.* 27 (2013) 315–323.
- 591 [24] A. Treves, and K.A. Martin, Hunters as stewards of wolves in Wisconsin and the Northern  
592 Rocky Mountains, USA. *Society and Natural Resources* 24 (2011) 984-994.
- 593 [25] F.J. Santiago-Ávila, and A. Treves, Poaching of protected wolves fluctuated seasonally and  
594 with non-wolf hunting. *Scientific Reports* 12 (2022) e1738
- 595 [26] R.B. Peyton, A profile of Michigan bear hunters and bear hunting issues. *Wildl. Soc. Bull.* 17  
596 (1989) 463-470.
- 597 [27] C. Lott, No pay for dead bear dogs. *Capitol Times*, Madison, WI. 12 October. (2002).
- 598 [28] A. Treves, K.J. Kapp, and D.M. Macfarland, American black bear nuisance complaints and  
599 hunter take. *Ursus* 21 (2010) 30–42.
- 600 [29] R. Willging, and A.P. Wydeven, Cooperative wolf depredation management in Wisconsin.  
601 in: C.D. Lee, and S.E. Hygnstrom, (Eds.), Thirteenth Great Plains Wildlife Damage Control  
602 Workshop Proceedings., Kansas State University Agricultural Experiment Station and  
603 Cooperative Extension Service, Lincoln, NE, 1997, pp. 46-51.
- 604 [30] I. SAS Institute, JMP 11.0, Cary, North Carolina. , 2013.
- 605 [31] I. Kojola, and J. Kuittinen, Wolf Attacks on Dogs in Finland. *Wildl. Soc. Bull.* 30 (2002) 498-  
606 501.

- 607 [32] R. Peterson, Wolves as interspecific competitors in canid ecology. in: L. Carbyn, S. Fritts,  
608 and D. Seip, (Eds.), Ecology and conservation of wolves in a changing world., Canadian  
609 Circumpolar Institute., Edmonton, Alberta, Canada, 1995, pp. 315-323.
- 610 [33] W.B. Ballard, L.N. Carbyn, and D.W. Smith, Wolf interactions with non-prey. in: L. Mech,  
611 and L. Boitani, (Eds.), Wolves: behavior, ecology, and conservation, University of Chicago  
612 Press, Chicago, 2003, pp. 259-271.
- 613 [34] J. Merkle, D. Stahler, and S. DW, Interference competition between gray wolves and  
614 coyotes in Yellowstone National Park. Canadian Journal of Zoology 87 (2009) 56-63.
- 615 [35] J. Ruprecht, D. Ausband, M. Mitchell, M. Garton, and P. Zager, Homesite attendance based  
616 on sex, breeding status, and number of helpers in gray wolf packs. J. Mammal. 93 (2012)  
617 1001-1005.
- 618 [36] T. Kreeger, The internal wolf: physiology, pathology, and pharmacology. in: B.L. Mech LD,  
619 (Ed.), Wolves: behavior, ecology, and conservation, University of Chicago Press, Chicago,  
620 2003, pp. 192-217.
- 621 [37] V. Van Ballenberghe, and L. Mech, Weights, growth, and survival of timber wolf pups in  
622 Minnesota. J. Mammal. 56 (1975) 44-63.
- 623 [38] E. Pulliainen, Studies on the wolf (*Canis lupus*) in Finland. Ann. Zool. Fenn. 2 (1965) 215-  
624 259.
- 625 [39] H.D. Steklis, and G.E. King, The craniocervical killing bite: Toward an ethology of primate  
626 predatory behavior. J. Hum. Evol. 7 (1978) 567-581.
- 627 [40] B. Van Valkenburgh, and C.B. Ruff., Canine tooth strength and killing behaviour in large  
628 carnivores. J. Zool. 212 (1987) 379-397.

- 629 [41] I. Khorozyan, G. Siavash, S. Mobin, M. Soofi, and M. Waltert, Studded leather collars are  
630 very effective in protecting cattle from leopard (*Panthera pardus*) attacks. (2020).
- 631 [42] A. Treves, C. Browne-Nunez, J. Hogberg, J. Karlsson Frank, L. Naughton-Treves, N. Rust, and  
632 Z. Voyles, Estimating poaching opportunity and potential. in: M.L. Gore, (Ed.),  
633 Conservation Criminology, John Wiley & Sons, New York, 2017, pp. 197-212.
- 634 [43] G. Chapron, and A. Treves, Blood does not buy goodwill: allowing culling increases  
635 poaching of a large carnivore. *Proceedings of the Royal Society B* 283 (2016) 20152939.
- 636 [44] G. Chapron, and A. Treves, Correction to ‘Blood does not buy goodwill: allowing culling  
637 increases poaching of a large carnivore’. *Proceedings of the Royal Society B* Volume 283  
638 (2016) 20162577.
- 639 [45] F.J. Santiago-Ávila, R.J. Chappell, and A. Treves, Liberalizing the killing of endangered  
640 wolves was associated with more disappearances of collared individuals in Wisconsin,  
641 USA. *Scientific Reports* 10 (2020) 13881.
- 642 [46] N.X. Louchouart, F.J. Santiago-Ávila, D.R. Parsons, and A. Treves, Evaluating how lethal  
643 management affects poaching of Mexican wolves *Open Science* 8 (registered report)  
644 (2021) 200330.
- 645 [47] A. Treves, F.J. Santiago-Ávila, and K. Putrevu, Quantifying the effects of delisting wolves  
646 after the first state began lethal management. *PeerJ* 9 (2021) e11666.
- 647 [48] E. Newcomer, M. Palladini, and L. Jones, The Endangered Species Act v. the United States  
648 Department of Justice: How the Department of Justice derailed criminal prosecutions  
649 under the Endangered Species Act. *Animal Law* 17 (2011) 241-271.

- 650 [49] T. Newsome, J.T. Bruskotter, and W.J. Ripple, When shooting a coyote kills a wolf:  
651 Mistaken identity or misguided management? *Biodivers. Conserv.* 24 (2015) 3145-3149.
- 652 [50] Atkins, Summary Report of Independent Peer Reviews for the U.S. Fish & Wildlife Service  
653 Gray Wolf Delisting Review, Atkins, [https://www.fws.gov/media/summary-report-](https://www.fws.gov/media/summary-report-independent-peer-reviews-gray-wolf-delisting-review)  
654 [independent-peer-reviews-gray-wolf-delisting-review](https://www.fws.gov/media/summary-report-independent-peer-reviews-gray-wolf-delisting-review), 2019.
- 655 [51] WildEarth Guardians, et al. v U.S. Department of Justice, U.S. District Court Arizona, 2015.
- 656 [52] E. von Essen, H.P. Hansen, H.N. Kallstrom, M.N. Peterson, and T.R. Peterson, The  
657 radicalisation of rural resistance: How hunting counterpublics in the Nordic countries  
658 contribute to illegal hunting. *Journal of Rural Studies* 39 (2015) 199-209.
- 659 [53] J.E. Richardson, The Cows May Safely Graze: Placing Expert-Lay Relationships at the Center  
660 of Overcoming the Expert-Lay Knowledge Divide. *Rural Sociology* in press (2022).
- 661 [54] S. Redpath, J.D.C. Linnell, M. Festa-Bianchet, L. Boitani, N. Bunnefeld, A. Dickman, R.  
662 Gutiérrez, J. Irvine, M. Johansson, A. Majić, B. Mcmanus, S. Pooley, C. Sandström, A.  
663 Sjölander-Lindqvist, K. Skogen, J.E. Swenson, A. Trouwhorst, J. Young, and E.J. Milner-  
664 Gulland, Don't forget to look down – collaborative approaches to predator conservation.  
665 *Biological Reviews* 92 (2017) 2157–2163.
- 666 [55] A. Treves, and C. Bonacic, Humanity's dual response to dogs and wolves. *Trends in Ecology*  
667 *and Evolution* TREE 31 (2016) 489-491.
- 668 [56] M. Germonpré, Mikhail V. Sablin, Rhiannon E. Stevensc, Robert E.M. Hedgesd, Michael  
669 Hofreitere, Mathias Stillere, and V.R. Desprése, Fossil dogs and wolves from Palaeolithic  
670 sites in Belgium, the Ukraine and Russia: osteometry, ancient DNA and stable isotopes.  
671 *Journal of Archaeological Science* 38 (2009) 473–490.

- 672 [57] M. Germonpré, Mikhail V. Sablin, Viviane Després, Michael Hofreiter, M. Láznicková-  
673 Galetová, R.E. Stevens, and M. Stiller, Palaeolithic dogs and the early domestication of  
674 the wolf: a reply to the comments of Crockford and Kuzmin (2012). *Journal of*  
675 *Archaeological Science* 40 (2012) 786-792.
- 676 [58] M. Germonpré, Palaeolithic dog skulls at the Gravettian Predmostí site, the Czech Republic.  
677 *Journal of Archaeological Science* 39 (2012) 184-202.
- 678



679 **Table 1.** The number of hounds reported in wolf-hound interactions by breed and month\*

| Breed         | Jan      | Feb      | Mar      | Apr      | May      | Jun      | Jul       | Aug       | Sep       | Oct      | Nov      | Dec       |
|---------------|----------|----------|----------|----------|----------|----------|-----------|-----------|-----------|----------|----------|-----------|
| Bluetick      | 0        | 1        | 0        | 0        | 0        | 0        | 3         | 6         | 8         | 0        | 0        | 1         |
| Plott         | 0        | 0        | 0        | 0        | 0        | 0        | 11        | 20        | 9         | 3        | 0        | 0         |
| Redbone       | 0        | 1        | 0        | 0        | 0        | 0        | 4         | 4         | 1         | 0        | 0        | 1         |
| Walker        | 0        | 0        | 0        | 1        | 0        | 0        | 16        | 19        | 16        | 3        | 1        | 5         |
| Other**       | 1        | 2        | 0        | 0        | 0        | 0        | 12        | 15        | 8         | 0        | 0        | 4         |
| <b>Totals</b> | <b>1</b> | <b>4</b> | <b>0</b> | <b>1</b> | <b>0</b> | <b>0</b> | <b>46</b> | <b>64</b> | <b>42</b> | <b>6</b> | <b>1</b> | <b>11</b> |

680

681 Table 2. Bystander reports (n=105) of 119 adverse interactions with hounds or their handlers

682 across counties of Wisconsin, USA. Because a respondent might report more than one

683 interaction, we present the counties from most reports (6) to fewest (1), the names of the 51

684 counties mentioned in reports, the sum of interactions per row, and the maximum number of

685 hounds reported in a single interaction. When multiple reports were filed about the same

686 interaction and the number of hounds differed, we counted only one interaction and

687 averaged the number of hounds, rounding to the higher integer.

| Reports per county | Sum of the interactions | Maximum number of hounds in a single interaction | Counties with interactions reported |
|--------------------|-------------------------|--------------------------------------------------|-------------------------------------|
| 6                  | 15                      | 8                                                | Bayfield, Iron, Sawyer              |

|   |    |   |                                                                                                                                                                                                                                                                                                                                                                                                                                          |
|---|----|---|------------------------------------------------------------------------------------------------------------------------------------------------------------------------------------------------------------------------------------------------------------------------------------------------------------------------------------------------------------------------------------------------------------------------------------------|
| 5 | 5  | 5 | Forest                                                                                                                                                                                                                                                                                                                                                                                                                                   |
| 4 | 4  | 6 | Langlade                                                                                                                                                                                                                                                                                                                                                                                                                                 |
| 3 | 13 | 6 | Chippewa, Dane, Marathon, Polk, Washburn                                                                                                                                                                                                                                                                                                                                                                                                 |
| 2 | 18 | 6 | Dodge, Douglas, Dunn, Florence, Lincoln,<br>Oconto, Price, Shawano                                                                                                                                                                                                                                                                                                                                                                       |
| 1 | 62 | 8 | Ashland, Barron, Brown, Burnett, Calumet,<br>Cheboygan MI, Columbia, Cuyahoga OH, Door,<br>Eau Claire, Fond du Lac, Gogebic, MI, Green,<br>Houghton, MI, Jackson, Kenosha, Kewaunee,<br>Macon, GA, Manitowoc, Marin, CA, Marinette,<br>Milwaukee, Nash, NC, Oneida, Ontonagon, MI,<br>Outagamie, Ozaukee, Rock, Rusk, St. Croix,<br>Sheboygan, Taylor, Trempealeau, Vernon, Vilas,<br>Walworth, Washington, Waukesha, Winnebago,<br>Wood |

688

689
